# Supplementary figures and images for: Tyrosine phosphorylation of Munc18‐1 inhibits synaptic transmission by preventing SNARE assembly
Source: PubMed Central journal article supplement — EMBO J. 2017 Nov 17;37(2):300–20. doi: 10.15252/embj.201796484 (PMC5770875; doi:10.15252/embj.201796484), 2017-11-17

Figure 1A:

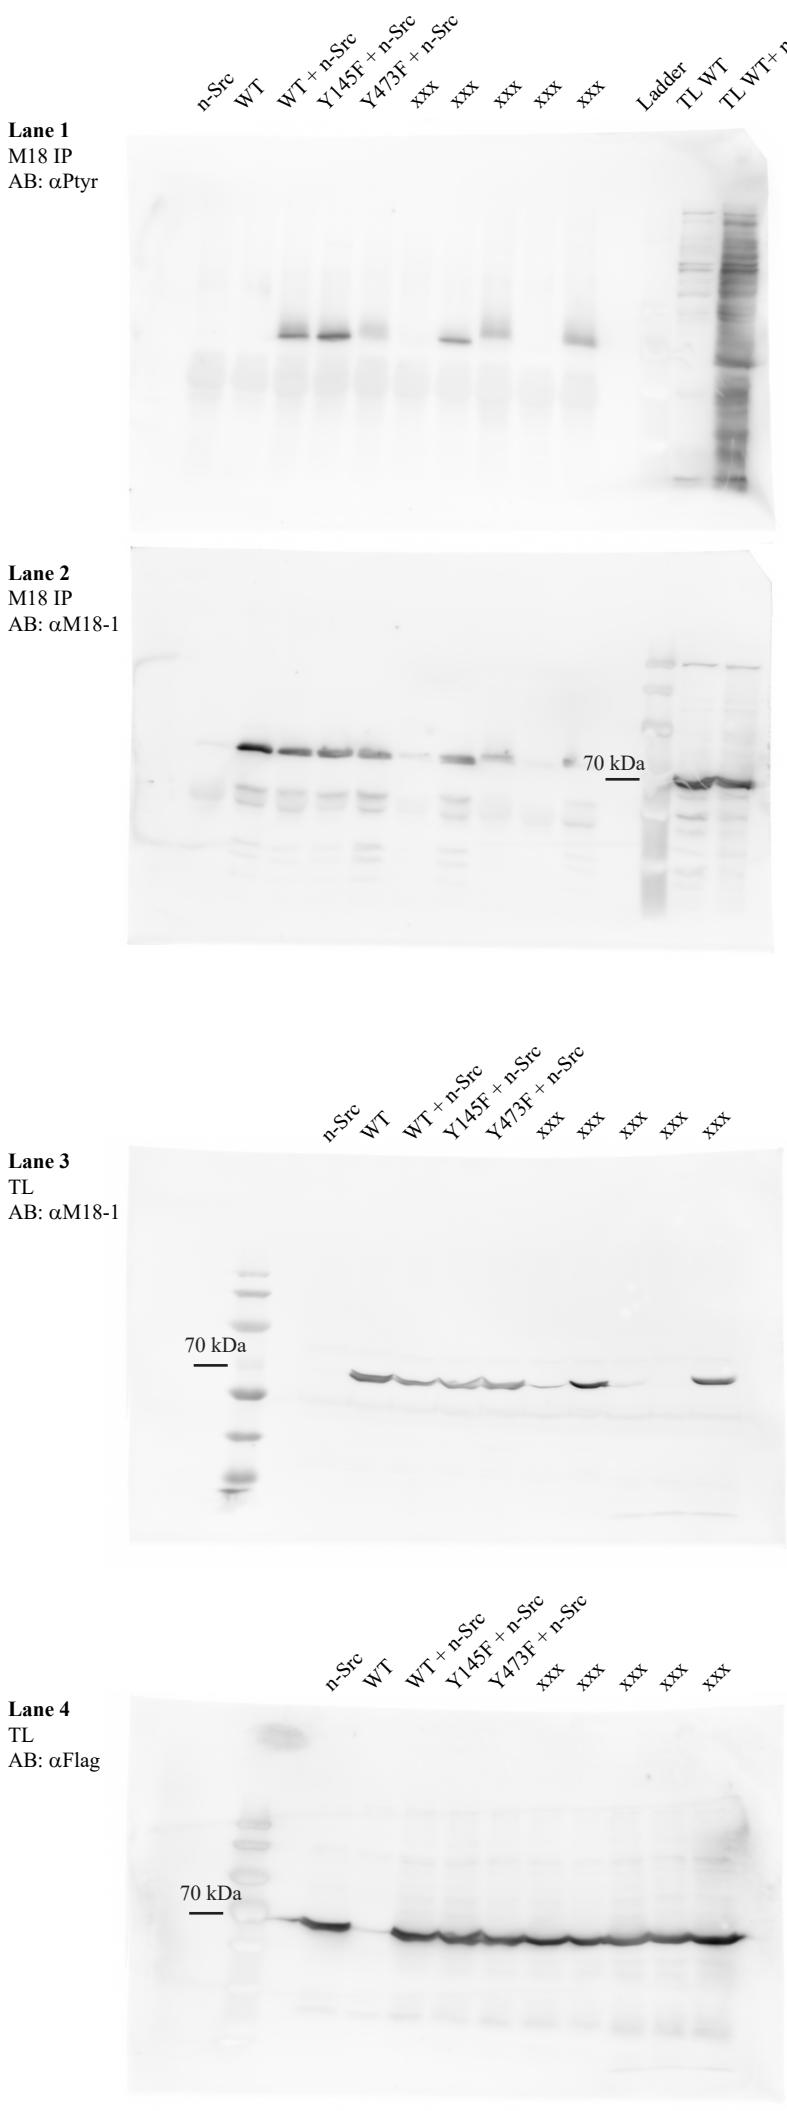

Figure 1B:

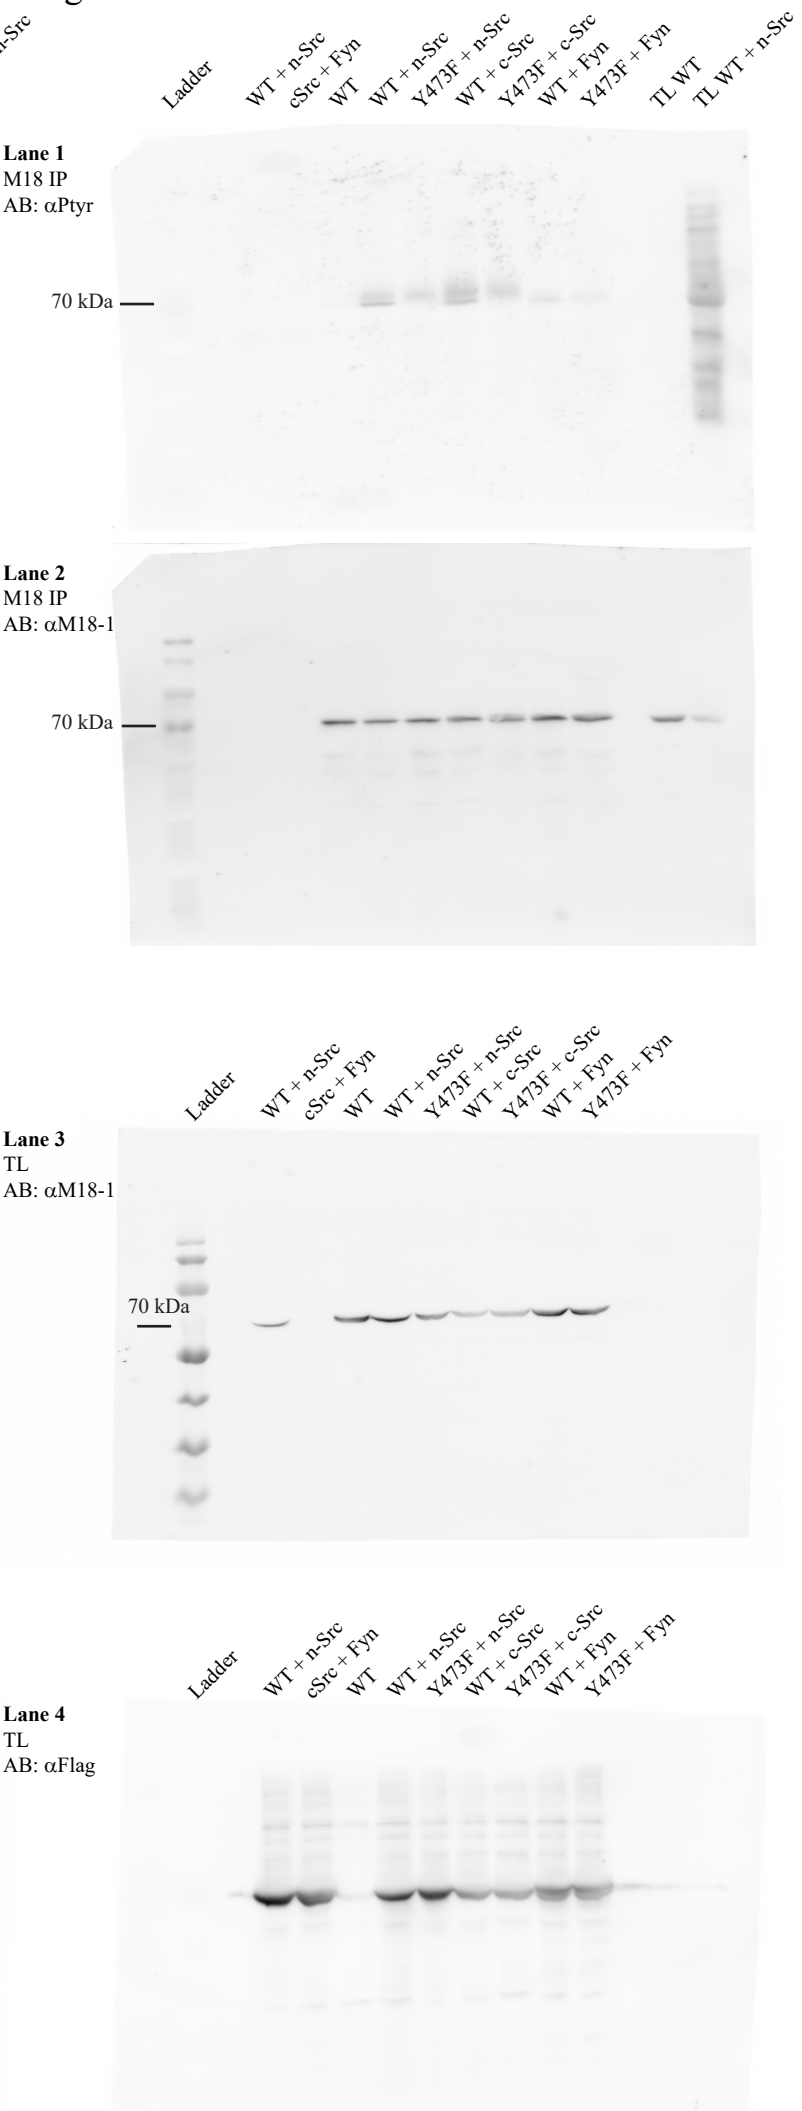

xxx = conditions unrelated to this manuscript

Supplement: EMBJ-37-300-s002.pdf [file EMBJ-37-300-s002.pdf]
